# Supplementary material for: MRI Assessed Placental Location as a Diagnostic Tool of Placental Invasiveness and Maternal Peripartum Morbidity
Source: MDPI journal article supplement (doi:10.3390/diagnostics14090925), 2024-04-29
Supplement: s1 [file s1]

**Table 1.** MRI protocol for placental evaluation for 1.5T magnet

| Sequence                        | T2-SSTSE |          |         | T2-TSE  |          |         |                |                   | T1-TSEFS |
|---------------------------------|----------|----------|---------|---------|----------|---------|----------------|-------------------|----------|
| Plane                           | Axial    | Sagittal | Coronal | Axial   | Sagittal | Coronal | Axial Oblique* | Coronal Oblique** | Axial    |
| TR (ms)                         | 510      | 532      | 568     | 6300    | 6300     | 6300    | 2500           | 2500              | 730      |
| TE (ms)                         | 80       | 80       | 80      | 90      | 90       | 90      | 90             | 90                | 6.9      |
| NSA                             | 1        | 1        | 1       | 2       | 2        | 2       | 2              | 2                 | 1        |
| Slice thickness/<br>Gap<br>(mm) | 5/1      | 5/1      | 5/1     | 3.5/1.2 | 3.5/1.2  | 4.5/1   | 4.5/1          | 4.5/1             | 5/1      |
| Matrix                          | 200x256  | 200x256  | 200x256 | 263x368 | 250x320  | 320x352 | 250x320        | 250x32            | 156x144  |
| FOV A-P<br>(mm)                 | 320      | 375      | 345     | 320     | 360      | 329     | 280            | 280               | 380      |

\* perpendicular to cervical axis (optional, when extrauterine spread is suspected)\*\*parallel to cervical axis (optional, when extrauterine spread is suspected)

MRI indicates for magnetic resonance imaging; T2-SSTSE indicates for T2-weighted single-shot turbo spin echo; T2-TSE indicates for T2-weighted turbo spin echo; T1-TSEFS indicates for T1-weighted-turbo-spin-echo-fat-suppressed; TR indicates for time repetition; TE indicates for time echo; NSA indicates for number of signals acquired; FOV indicates for field of view; A-P indicates for anterior-posterior
