# Supplementary material for: MRI Assessed Placental Location as a Diagnostic Tool of Placental Invasiveness and Maternal Peripartum Morbidity
Source: MDPI journal article supplement (doi:10.3390/diagnostics14090925), 2024-04-29
Supplement: s1 [file s1]

**Table 2.** MRI protocol for placental evaluation for 3.0-T magnet

| Sequence                    | T2W-MVXD |          |         | T2-TSE            |                      | T1W-TSE<br>FS |
|-----------------------------|----------|----------|---------|-------------------|----------------------|---------------|
| Plane                       | Axial    | Sagittal | Coronal | Axial<br>Oblique* | Coronal<br>Oblique** | Axial         |
| TR (ms)                     | 4345     | 4755     | 4666    | 4807              | 4807                 | 723           |
| TE (ms)                     | 100      | 100      | 100     | 90                | 90                   | 8.0           |
| NSA                         | 1        | 1        | 1       | 1                 | 1                    | 1             |
| Slice thickness/Gap<br>(mm) | 5/0.5    | 5/1.2    | 5/0.5   | 3.0/0.0           | 3.0/0.0              | 5.0/1.2       |
| Matrix                      | 380x380  | 380x380  | 400x400 | 290x310           | 290x310              | 252x277       |
| FOV A-P (mm)                | 320      | 380      | 380     | 230               | 230                  | 350           |

\*perpendicular to cervical axis; \*\*parallel to cervical axis

MRI indicates for magnetic resonance imaging; T2W-MVXD indicates for T2-weighted-MultiVaneXD; T2-TSE indicates for T2-weighted turbo spin echo; T1-TSEFS indicates for T1-weighted-turbo-spin-echo-fat-suppressed; TR indicates for time repetition; TE indicates for time echo; NSA indicates for number of signals acquired; FOV indicates for field of view; A-P indicates for anterior-posterior
